# Supplementary material for: Integrated analysis profiles of long non-coding RNAs reveal potential biomarkers of drug resistance in lung cancer
Source: PubMed Central journal article supplement (PMC5609887; doi:10.18632/oncotarget.16444), 2017-03-22
Supplement: oncotarget-08-62868-s001.pdf [file oncotarget-08-62868-s001.pdf]

## **Integrated analysis profiles of long non-coding RNAs reveal potential biomarkers of drug resistance in lung cancer**

### **SUPPLEMENTARY TABLES**

**Supplementary Table 1: Overlapping differential expression of lncRNAs in drug resistance of lung cancer. (XLS).  
See Supplementary File 1**

**Supplementary Table 2: Overlapping differential expression of mRNAs in drug resistance of lung cancer. (XLS).  
See Supplementary File 2**

**Supplementary Table 3: U133\_refseq\_NR lncRNA. (XLS).  
See Supplementary File 3**
